# Supplementary material
Source: PubMed Central journal article supplement (PMC8744316)
Supplement: 12879_2022_7031_MOESM1_ESM.pdf [file 12879_2022_7031_MOESM1_ESM.pdf]

Table A. The number of participants according to Lebanese **governorates and villages**

| Governates        | Villages       | Number of segments | Estimated sample size | Number of participants | Response rate |
|-------------------|----------------|--------------------|-----------------------|------------------------|---------------|
| Beirut            | Ras nabea      | 4                  | 26                    | 26                     | 100           |
|                   | Nwayreh        | 3                  | 26                    | 27                     | 104           |
|                   | Zkak Iblat     | 4                  | 26                    | 26                     | 100           |
|                   | Khandaa ghamea | 1                  | 26                    | 26                     | 100           |
|                   | tarea jdideh   | 4                  | 30                    | 30                     | 100           |
|                   | Mala           | 3                  | 26                    | 27                     | 104           |
|                   | Total          | 19                 | 153                   | 162                    | 106           |
| Mount Lebanon     | Haret Hreik    | 8                  | 151                   | 152                    | 101           |
|                   | Jounieh        | 10                 | 151                   | 153                    | 101           |
|                   | Jiyeh          | 10                 | 152                   | 155                    | 102           |
|                   | Amrousiyeh     | 6                  | 152                   | 155                    | 102           |
|                   | Chouweifat     | 6                  | 152                   | 155                    | 102           |
|                   | Maten Aala     | 10                 | 152                   | 155                    | 102           |
|                   | Total          | 50                 | 911                   | 925                    | 102           |
| Bekaa             | Machghara      | 4                  | 23                    | 25                     | 109           |
|                   | Libeya         | 4                  | 23                    | 25                     | 109           |
|                   | Sohmor         | 4                  | 23                    | 25                     | 109           |
|                   | rachya         | 3                  | 23                    | 25                     | 109           |
|                   | Hasbya         | 3                  | 22                    | 21                     | 95            |
|                   | Karoon         | 3                  | 20                    | 20                     | 100           |
|                   | Total          | 23                 | 134                   | 143                    | 107           |
| Baalbek El-Hermel | Hermel         | 4                  | 20                    | 20                     | 100           |
|                   | Britel         | 4                  | 10                    | 10                     | 100           |
|                   | Boday          | 4                  | 15                    | 15                     | 100           |
|                   | Zahle          | 4                  | 20                    | 20                     | 100           |
|                   | bet shema      | 4                  | 15                    | 17                     | 113           |
|                   | Baalbek        | 4                  | 30                    | 30                     | 100           |
|                   | Total          | 24                 | 110                   | 112                    | 102           |
| South Lebanon     | Jizin          | 3                  | 42                    | 42                     | 100           |
|                   | Hosh           | 5                  | 43                    | 43                     | 100           |
|                   | Sour           | 4                  | 45                    | 50                     | 111           |
|                   | Ghaziyeh       | 3                  | 45                    | 44                     | 98            |
|                   | Sarafand       | 4                  | 42                    | 45                     | 107           |
|                   | Borj shmele    | 3                  | 45                    | 45                     | 100           |
|                   | Total          | 22                 | 262                   | 269                    | 103           |
| Nabatieh          | Ayneta         | 4                  | 28                    | 28                     | 100           |
|                   | Taybeh         | 4                  | 28                    | 28                     | 100           |
|                   | Aytaroun       | 3                  | 28                    | 28                     | 100           |
|                   | Bent Jbeil     | 4                  | 30                    | 30                     | 100           |
|                   | Kfarkila       | 3                  | 28                    | 28                     | 100           |
|                   | Idayse         | 3                  | 28                    | 23                     | 82            |
|                   | Total          | 21                 | 170                   | 165                    | 97            |
| North Lebanon     | Batroun        | 4                  | 95                    | 60                     | 63            |
|                   | Bcharre        | 4                  | 95                    | 50                     | 53            |
|                   | Bnahrn         | 3                  | 96                    | 53                     | 55            |
|                   | Total          | 11                 | 286                   | 163                    | 57            |
| Akkar             | Habchit        | 3                  | 73                    | 69                     | 95            |
|                   | Akkar          | 5                  | 72                    | 50                     | 69            |
|                   | Total          | 8                  | 145                   | 119                    | 82            |
